# Supplementary material for: T cell receptor sequencing identifies prior SARS-CoV-2 infection and correlates with neutralizing antibodies and disease severity
Source: PubMed Central journal article supplement (PMC9220924; doi:10.1172/jci.insight.150070), 2022-05-23
Supplement: jciinsight-7-150070-s039.pdf [file jciinsight-7-150070-s039.pdf]

# **T-cell receptor sequencing identifies prior SARS-CoV-2 infection and correlates with neutralizing antibodies and disease severity**

Rebecca Elyanow,<sup>1\*</sup> Thomas M. Snyder,<sup>1\*</sup> Sudeb C. Dalai,<sup>1,2\*\*</sup> Rachel M. Gittelman,<sup>1</sup>  
Jim Boonyaratanakornkit,<sup>3,4</sup> Anna Wald,<sup>3,4,5,6</sup> Stacy Selke,<sup>6</sup> Mark H. Wener,<sup>3,6</sup>  
Chihiro Morishima,<sup>6</sup> Alexander L. Greninger,<sup>6</sup> Michael Gale Jr.,<sup>7,8,9</sup> Tien-Ying Hsiang,<sup>7</sup>  
Lichen Jing,<sup>3</sup> Michael R. Holbrook,<sup>10</sup> Ian M. Kaplan,<sup>1</sup> H. Jabran Zahid,<sup>11</sup>  
Damon H. May,<sup>1</sup> Jonathan M. Carlson,<sup>11</sup> Lance Baldo,<sup>1</sup> Thomas Manley,<sup>1\*\*</sup>  
Harlan S. Robins,<sup>1</sup> David M. Koelle<sup>3,4,6,9,12</sup>

\*These authors share the first-author position and are listed in alphabetical order.

\*\*Author was an Adaptive employee at time of research.

<sup>1</sup>Adaptive Biotechnologies, Seattle, Washington, USA

<sup>2</sup>Stanford University School of Medicine, Stanford, California, USA

<sup>3</sup>Department of Medicine, University of Washington, Seattle, Washington, USA

<sup>4</sup>Fred Hutchinson Cancer Research Center, Seattle, Washington, USA

<sup>5</sup>Department of Epidemiology, University of Washington, Seattle, Washington, USA

<sup>6</sup>Department of Laboratory Medicine and Pathology, University of Washington, Seattle, Washington, USA

<sup>7</sup>Department of Immunology, University of Washington, Seattle, Washington, USA

<sup>8</sup>Department of Microbiology, University of Washington, Seattle, Washington, USA

<sup>9</sup>Department of Global Health, University of Washington, Seattle, Washington, USA

<sup>10</sup>National Institute of Allergy and Infectious Diseases Integrated Research Facility,  
Frederick, Maryland, USA

<sup>11</sup>Microsoft Research, Redmond, Washington, USA

<sup>12</sup>Benaroya Research Institute, Seattle, Washington, USA

Corresponding author:

David M. Koelle, MD

750 Republican Street

Room E651, Mail Stop 358061

Seattle, WA 98109 USA

Tel (206) 616-1940

[DKoelle@medicine.washington.edu](mailto:DKoelle@medicine.washington.edu)

## Supplemental Materials

### Supplemental Tables

**Supplemental Table 1. Longitudinal sensitivity of the T-Cell, EUROIMMUN, and Abbott ARCHITECT tests by time from symptom onset.**

| Days From Symptom Onset        | T-Cell Test        |           | EUROIMMUN (anti-S1 IgG) |           | Abbott ARCHITECT (anti-NP IgG) |           |
|--------------------------------|--------------------|-----------|-------------------------|-----------|--------------------------------|-----------|
|                                | Sensitivity        | 95% CI    | Sensitivity             | 95% CI    | Sensitivity                    | 95% CI    |
| <b>All samples<sup>A</sup></b> | 317/357<br>(88.8%) | 85.1–91.9 | 297/357<br>(83.2%)      | 79.0–86.8 | 300/357<br>(84.0%)             | 79.8–87.7 |
| <b>29–50</b>                   | 60/70<br>(85.7%)   | 77.1–92.9 | 57/70<br>(81.4%)        | 71.4–90.0 | 59/70<br>(84.3%)               | 75.7–91.4 |
| <b>51–100</b>                  | 154/170<br>(90.6%) | 85.9–94.7 | 145/170<br>(85.3%)      | 80.0–90.6 | 146/170<br>(88.8%)             | 83.5–93.5 |
| <b>101–150</b>                 | 84/97<br>(86.6%)   | 79.4–92.8 | 81/97<br>(83.5%)        | 76.3–90.7 | 80/97<br>(82.5%)               | 75.3–89.7 |
| <b>150–190<sup>B</sup></b>     | 19/20<br>(95%)     | 85.0–100  | 14/20<br>(70%)          | 50.0–90.0 | 10/20<br>(50%)                 | 30.0–70.0 |

<sup>A</sup>  $P=0.01$ , T-cell test vs EUROIMMUN or Abbott ARCHITECT by mid-p McNemar's test.

<sup>B</sup>  $P<0.03$ , T-cell test vs EUROIMMUN or Abbott ARCHITECT by mid-p McNemar's test.

NP, nucleoprotein; S1, spike protein subunit 1.

**Supplemental Table 2. Longitudinal sensitivity of the T-cell, EUROIMMUN, and Abbott ARCHITECT tests for hospitalized and non-hospitalized patients.**

| Days<br>From<br>Symptom<br>Onset   | T-Cell Test      |                      | EUROIMMUN<br>(anti-S1 IgG) |                      | Abbott ARCHITECT<br>(anti-NP IgG) |                      |
|------------------------------------|------------------|----------------------|----------------------------|----------------------|-----------------------------------|----------------------|
|                                    | Hospitalized     | Non-<br>Hospitalized | Hospitalized               | Non-<br>Hospitalized | Hospitalized                      | Non-<br>Hospitalized |
| <b>All<br/>samples<sup>A</sup></b> | 41/44<br>(93.2%) | 276/313<br>(88.2%)   | 44/44<br>(97.7%)           | 254/313<br>(81.2%)   | 42/45<br>(95.5%)                  | 257/313<br>(82.4%)   |
| <b>29–50</b>                       | 3/4<br>(75%)     | 57/66<br>(86.4%)     | 4/4<br>(100%)              | 53/66<br>(80.3%)     | 4/4<br>(100%)                     | 55/66<br>(83.3%)     |
| <b>51–100</b>                      | 16/17<br>(94.1%) | 138/153<br>(90.2%)   | 16/17<br>(94.1%)           | 129/153<br>(84.3%)   | 16/17<br>(94.1%)                  | 135/153<br>(88.2%)   |
| <b>101–150</b>                     | 18/19<br>(94.7%) | 66/78<br>(84.6%)     | 19/19<br>(100%)            | 62/78<br>(79.5%)     | 18/19<br>(94.7%)                  | 62/78<br>(79.5%)     |
| <b>150–190</b>                     | 4/4<br>(100%)    | 15/16<br>(93.8%)     | 4/4<br>(100%)              | 10/16<br>(62.5%)     | 4/4<br>(100%)                     | 6/16<br>(37.5%)      |

<sup>A</sup>  $P=0.15$  for hospitalized individuals and  $P=0.01$  for non-hospitalized individuals comparing T-cell test vs EUROIMMUN or Abbott ARCHITECT by mid-p McNemar's test.

NP, nucleoprotein; S1, spike protein subunit 1.

## Supplemental Figures

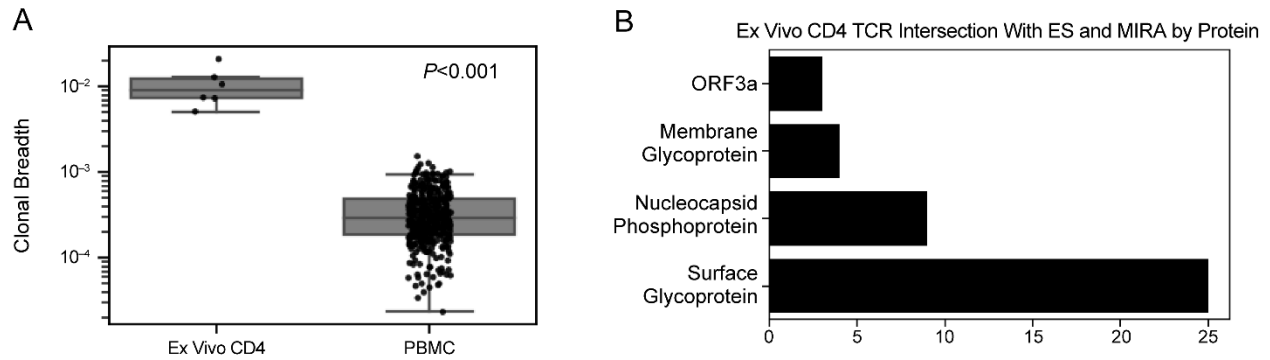

**Supplemental Figure 1. Quantification of SARS-CoV-2-specific enhanced sequences and MIRA TCRs in ex vivo AIM-sorted CD4+ T cells. (A)** PBMCs from 3 convalescent donors at 2 timepoints were subjected to AIM-based enrichment of SARS-CoV-2-specific T-cells using whole cell-associated viral antigen. Clonal breadth of SARS-CoV-2-specific enhanced sequences was compared between AIM-sorted CD4+ T cells and matched convalescent PBMCs. Significance was evaluated by Mann-Whitney U test. Data are expressed as median  $\pm$  interquartile ranges. **(B)** Intersection of SARS-CoV-2-specific TCRs present in ex vivo AIM-sorted CD4+ T-cells and MIRA TCR set, annotated by protein specificity.

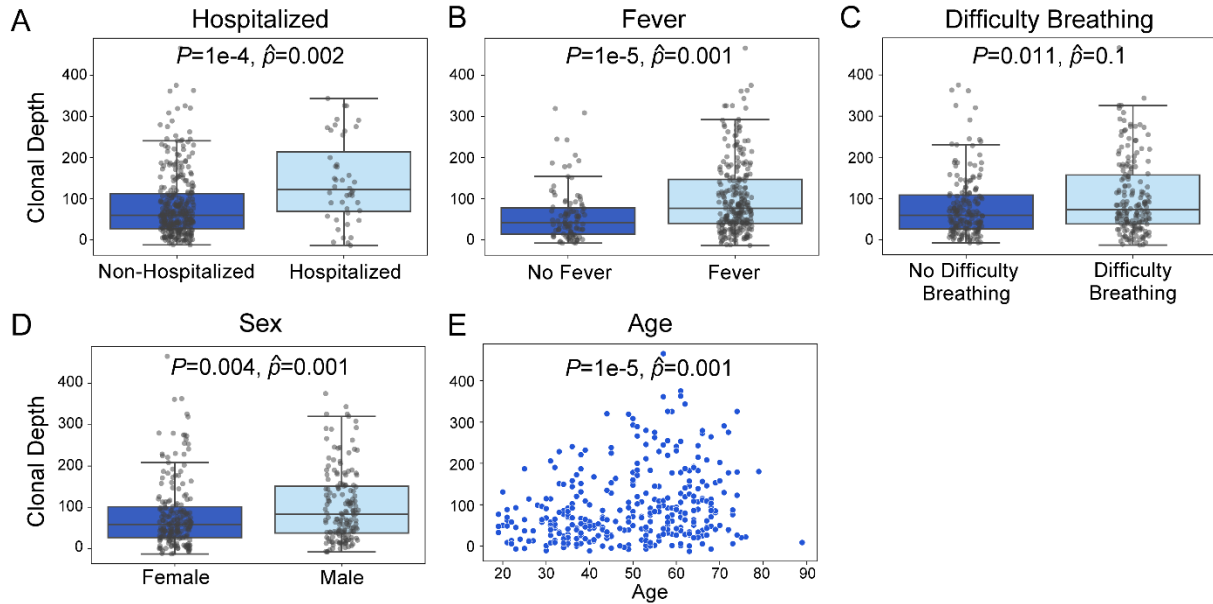

**Supplemental Figure 2. Association of T-cell clonal depth with clinical variables.**

Correlation of clonal depth with (A) hospitalization, (B) fever, (C) difficulty breathing, (D) sex, and (E) age was evaluated by univariate Mann-Whitney U test (p) and multivariate linear regression with age, sex, hospitalization, fever, difficulty breathing, and TCR rearrangements as variables ( $\hat{\beta}$ ). Data are expressed as median  $\pm$  interquartile ranges ( $n=302$ ). Population means and 95% confidence interval (CI) values for panels A–E were as follows: (A) Non-hospitalized, 88.3 (97.0-97.8), hospitalized, 168.3 (126.2-210.5); (B) no fever, 63.6 (50.3-76.9, fever, 108.2 (96.3-120.1); (C) no difficulty breathing, 85.6 (73.4-97.8), difficulty breathing, 105.4 (90.5-120.2); (D) female, 85.0 (72.4-97.6), male, 107.6 (93.1–122.1).

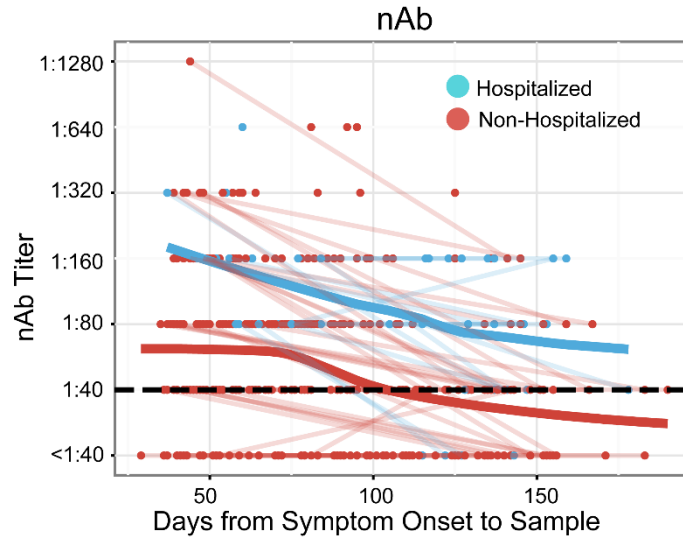

**Supplemental Figure 3. Neutralizing antibody titer as a function of days from symptom onset to sample collection.** Blue and red dots indicate hospitalized and non-hospitalized individuals, respectively. Trend lines connect visit 1 and visit 2 samples from the same individual. Blue and red bold trend lines indicate smoothed means [locally estimated scatterplot smoothing, LOESS (1)] for hospitalized and non-hospitalized individuals ( $n=302$ ), respectively.

## Supplemental Reference

1. Cleveland WS. LOWESS: a program for smoothing scatterplots by robust locally weighted regression. *Am Stat.* 1981;35(1):54.
